# Supplementary material
Source: Springer Nature journal article supplement (https://www.springermedizin.de/resource/supplementary/12914_2005_28_MOESM2_ESM.pdf/9537364)

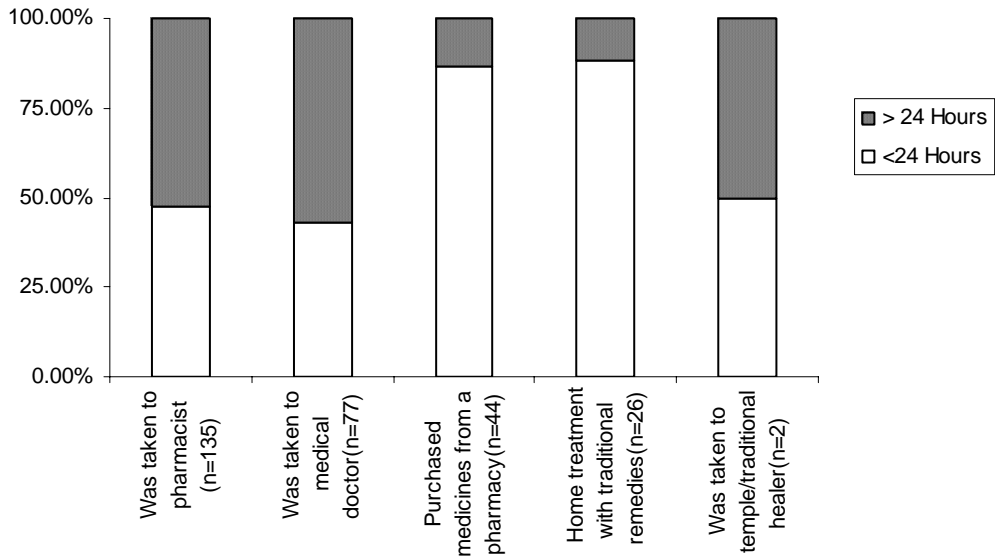

Supplement: MOESM2 [file 9537364]
